# Supplementary material for: Hotspots Identification and Classification of Dockless Bicycle Sharing Service under Electric Fence Circumstances
Source: Hindawi journal article supplement (doi:10.1155/2022/5218254), 2022-03-31
Supplement: f1 [file 5218254.f1.docx]

Illustration of Figure 1 Graphical abstract:

1. Origin/destination events in each grid extracted from bicycle-sharing trip dataset are packed as the input of the DBSCAN cluster algorithm.
2. It reported 47 pick-up hotspots and 53 return hotspots on Xiamen Island.
3. Using electric fence data and Point of interest (POI) data, an evaluation framework covering three aspects (supply and demand, unbalance, and land use) are developed to assess the characteristics of return hotspots.
4. Using the Gaussian-mixture clustering algorithm. 53 return hotspots are classified into three clusters, including hotspots where BS is in overload status, hotspots where BS service quality needs to be improved, and hotspots where BS is in stable status.
5. Parking management schemes and policy implications are proposed based on the classification result.


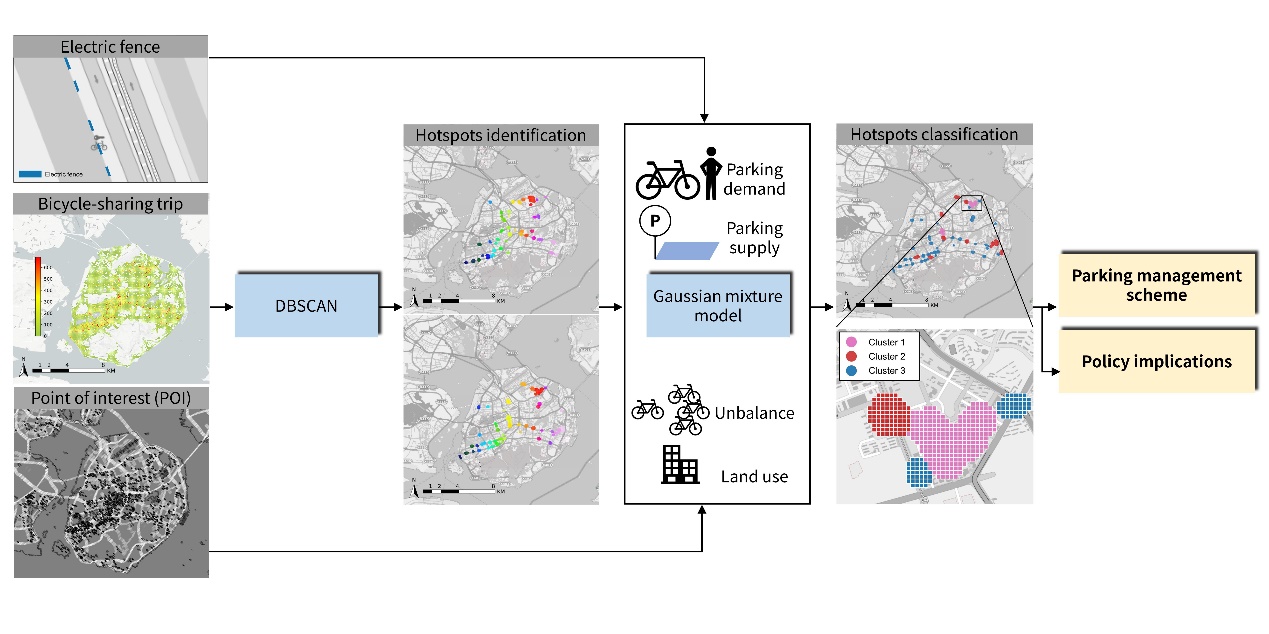


Figure 1 Graphical abstract
